# Supplementary material for: Propranolol induces a favourable shift of anti-tumor immunity in a murine spontaneous model of melanoma
Source: PubMed Central journal article supplement (PMC5363624; doi:10.18632/oncotarget.12833), 2016-10-24
Supplement: oncotarget-07-77825-s001.pdf [file oncotarget-07-77825-s001.pdf]

## Propranolol induces a favourable shift of anti-tumor immunity in a murine spontaneous model of melanoma

### SUPPLEMENTARY TABLE

Supplementary Table S1: Antibodies used for flow cytometry and immunohistochemistry

| <i>Target</i>                               | <i>Reference / Clone</i> | <i>Brand</i>      | <i>Dilution</i> | <i>Negative control</i>     |
|---------------------------------------------|--------------------------|-------------------|-----------------|-----------------------------|
| <i>Antibodies for FACS analyses</i>         |                          |                   |                 |                             |
| CD107a-PE-Cy7                               | 560647/ 1D4B             | BD Pharmingen     | 1/100           | PE-Cy7 Rat IgG2a            |
| CD11b- APC                                  | 17-0112-81/M1/70         | Ebiosciences      | 1/500           | APC-Rat IgG2b               |
| CD11c-PE-Cy7                                | 558079/HL3               | BD Pharmingen     | 1/100           | PE-Cy7 Hamster IgG1         |
| CD19-FITC                                   | 557398/ 1D3              | BD Pharmingen     | 1/100           | FITC Rat IgG2a              |
| CD4-PB                                      | 558107 / RM4.5           | BD Pharmingen     | 1/100           | Pacific Blue Rat IgG2a      |
| CD45.2-APC                                  | 558702/ 104              | BD Pharmingen     | 1/100           | APC mouse IgG2a             |
| CD45.2-PercpCy5.5                           | 552950 / 104             | BD Pharmingen     | 1/100           | PercpCy5.5 mouse IgG2a      |
| CD8-APC-H7                                  | 560182/ 53-6,7           | BD Pharmingen     | 1/100           | APC-H7 Rat IgG2a            |
| Ly6C-v450                                   | 560594/ AL-21            | BD Pharmingen     | 1/100           | V450 Rat IgM                |
| Ly6G-FITC                                   | 551460/ 1A8              | BD Pharmingen     | 1/100           | FITC-Rat IgG2a              |
| NK1.1-PE                                    | 553165/ PK136            | BD Pharmingen     | 1/100           | PE mouse IgG2a              |
| NK1.1-PerCP-Cy5.5                           | 551114/ PK136            | BD Pharmingen     | 1/100           | Percp-Cy5.5 mouse IgG2a     |
| TCR $\beta$ -AF-700                         | 553172/ H57-597          | BD Pharmingen     | 1/100           | AF700 armenian hamster IgG2 |
| TCRgd-PE                                    | 553178 / GL3             | BD Pharmingen     | 1/100           | PE armenian hamster IgG2    |
| <i>Antibodies for Histology experiments</i> |                          |                   |                 |                             |
| CD3                                         | Ab16669/SP7              | Abcam             | 1/100           | Without primary and CD34    |
| CD34                                        | Ab81289/EP373Y           | Abcam             | 1/200           | Without primary and CD3     |
| NK cell                                     | MA1-70100/PK136          | Thermofisher      | 1/100           | Mouse IgG2a                 |
| CD8 alpha                                   | 14-0808-80/4SM15         | Ebiosciences      | 1/50            | Rat IgG2a                   |
| Granzyme B                                  | ABIN675354               | Antibodies online | 1/200           | Without primary             |
| Ki67                                        | 652402/16A8              | Biologend         | 1/100           | Rat IgG2a                   |
| Mouse IgG2a isotype                         | MAB0031                  | RnD systems       | 1/100           | Without primary             |
| Rat IgG2a isotype                           | 559073                   | BD Pharmingen     | 1/50 - 1/100    | Without primary             |
